# Supplementary material for: A pH-dependent bolt involving cytosine bases located in the lateral loops of antiparallel G-quadruplex structures within the SMARCA4 gene promotor
Source: PubMed Central journal article supplement (PMC6825181; doi:10.1038/s41598-019-52311-5), 2019-11-01

## A pH-dependent bolt involving cytosine bases located in the lateral loops of antiparallel G-quadruplex structures within the SMARCA4 gene promotor

Sanae Benabou<sup>1</sup>, Stefania Mazzini<sup>2</sup>, Anna Aviñó<sup>3</sup>, Ramon Eritja<sup>3</sup>, Raimundo Gargallo<sup>1\*</sup>

### Contents:

- Table S1 Watson-Crick-based folding predictions based on *in silico* analysis using the mfold web server method
- Table S2 G-quadruplex folding predictions based on *in silico* analysis using the QGRS mapper web server
- Table S3 Influence of K<sup>+</sup> concentration on T<sub>m</sub> and thermodynamic data calculated from the melting experiments of SMG03
- Table S4 Influence of pH on T<sub>m</sub> and thermodynamic data calculated from the melting experiments of SMG03 and mutants
- Figure S1 Thermal Difference and CD spectra and of SMG01-SMG04 sequences
- Figure S2 Acid-base titration of SMG03
- Figure S3 Acid-base titration of TBA
- Figure S4 Acid-base titration of SMG03T6
- Figure S5 Acid-base titration of SMG03T11
- Figure S6 Acid-base titration of SMG03T16
- Figure S7 Heating/cooling traces of SMG03 at pH 5.0 and 6.0
- Figure S8 CD and melting experiments of SMG03A7
- Figure S9 Size-Exclusion chromatography
- Figure S10 Imino proton region of <sup>1</sup>H NMR spectra at pH 9.0
- Figure S11 Imino proton region of <sup>1</sup>H NMR spectra of SMG03 at different temperatures
- Figure S12 Augmented bilinear model for a row-wise augmented matrix of the same by CD and molecular spectroscopy
- Figure S13 Multivariate analysis of acid-base titrations of SMG01, SMG01T6 and SMG01T16
- Figure S14 MALDI-TOF MS spectra of oligonucleotides

**Table S1. Watson-Crick-based folding predictions based on *in silico* analysis using the mfold web server method.**

The calculations were done using the web server located in <http://unafold.rna.albany.edu/?q=mfold/DNA-Folding-Form>. Standard errors are roughly  $\pm 5\%$ ,  $\pm 10\%$ ,  $\pm 11\%$  and 2-4 °C for free energy, enthalpy, entropy and  $T_m$ , respectively. Calculations were done considering 25 °C and 150 mM Na<sup>+</sup>.

| Sequence name | Proposed structure | $\Delta G_{250C}$ (kcal·mol <sup>-1</sup> ) | $T_m$ (°C) |
|---------------|--------------------|---------------------------------------------|------------|
| SMG01         |                    | -2.98                                       | 43         |
|               |                    | -2.88                                       | 43         |
|               |                    | -2.69                                       | 40         |
| SMG02         |                    | -0.56                                       | 33         |

|       |  |       |    |
|-------|--|-------|----|
| SMG03 |  | -0.46 | 32 |
| SMG04 |  | -2.88 | 43 |

**Table S2. G-quadruplex folding predictions based on *in silico* analysis using the QGRS mapper web server.**

The table summarizes those sequences showing the highest G-score, i.e., those that are more prone to form stable G-quadruplex structure.

The webserver is available at <http://bioinformatics.ramapo.edu/QGRS/index.php>. The standard search criteria have been used: QGRS maximum length (30), min G-group size (2) and loop size ranging from 0 to 36 nucleotides.

| Sequence name | Position of the predicted G-quadruplex into the sequence (5'-> 3') | G-score |
|---------------|--------------------------------------------------------------------|---------|
| SMG01         | GGG GTT CAT GAC CAA <b>GGG CGA GGC AGG ACA GGG</b> ATA GCA AGG GA  | 20      |
| SMG02         | A <b>GGC AGG ACA GGG ATA GCA AGG</b> GA                            | 16      |
| SMG03         | AA <b>GGG CGA GGC AGG ACA GGG</b> A                                | 20      |
| SMG04         | <b>GGG GTT CAT GAC CAA GGG CGA GGC AGG</b> A                       | 12      |
| TBA           | <b>GG TT GG TGT GG TT GG</b>                                       | 20      |

The TBA sequence, which is known to form a stable G-quadruplex structure, has been included to compare the value of its corresponding G-score with those of the studied sequences.

**Table S3. Influence of K<sup>+</sup> concentration on T<sub>m</sub> and thermodynamic data calculated from the melting experiments of SMG03.**

Thermodynamic values refer to the unfolding process. Uncertainties in T<sub>m</sub>, ΔH, ΔS, and ΔG<sub>37</sub> are ±0.7 °C, 5%, 5% and 10%, respectively. In all cases, a two-step process has been considered. The experimental conditions were 20 mM phosphate buffer (pH 7.1) and 2 μM DNA concentration.

| SMG03      | T <sub>m</sub> (°C) | ΔH (kcal·mol <sup>-1</sup> ) | ΔS (cal·K <sup>-1</sup> ·mol <sup>-1</sup> ) | ΔG <sub>37</sub> (kcal·mol <sup>-1</sup> ) |
|------------|---------------------|------------------------------|----------------------------------------------|--------------------------------------------|
| 0 mM KCl   | 22.8                | 20.3                         | 68.5                                         | -0.98                                      |
| 50 mM KCl  | 26.5                | 21.4                         | 71.4                                         | -0.67                                      |
| 100 mM KCl | 32.5                | 22.5                         | 73.9                                         | -0.34                                      |
| 150 mM KCl | 37.0                | 23.3                         | 75.3                                         | 0.00                                       |

**Table S4. Influence of pH on  $T_m$  and thermodynamic data calculated from the melting experiments of SMG03 and mutants**

Thermodynamic values refer to the unfolding process.  $T_m$ ,  $\Delta H$ ,  $\Delta S$  and  $\Delta G$  values are given in °C, kcal·mol<sup>-1</sup>, cal·K<sup>-1</sup>·mol<sup>-1</sup>, and kcal·mol<sup>-1</sup>, respectively. Uncertainties in  $T_m$ ,  $\Delta H$ ,  $\Delta S$ , and  $\Delta G_{37}$  are  $\pm 0.7$  °C, 5%, 5% and 10%, respectively.

In all cases, a two-step process has been considered. The experimental conditions were 20 mM acetate or phosphate buffer, 150 mM KCl and 2  $\mu$ M DNA concentration.

|          | pH 5.0 |            |            |                 | pH 6.0 |            |            |                 | pH 7.4 |            |            |                 |
|----------|--------|------------|------------|-----------------|--------|------------|------------|-----------------|--------|------------|------------|-----------------|
|          | $T_m$  | $\Delta H$ | $\Delta S$ | $\Delta G_{37}$ | $T_m$  | $\Delta H$ | $\Delta S$ | $\Delta G_{37}$ | $T_m$  | $\Delta H$ | $\Delta S$ | $\Delta G_{37}$ |
| SMG03    | 60.0   | 28.6       | 86         | 1.98            | 48.8   | 34.3       | 106.7      | 1.25            | 37.0   | 23.3       | 75.3       | 0.00            |
| SMG03T6  | 53.4   | 31.6       | 96.8       | 1.59            | 38.2   | 34.4       | 110.4      | 0.13            | 38.7   | 28.7       | 92.0       | 0.16            |
| SMG03T11 | 63.1   | 29.7       | 88.4       | 2.30            | 48.7   | 44.8       | 139.2      | 1.63            | 39.0   | 39.0       | 125.2      | 0.24            |
| SMG03T16 | 51.4   | 32.4       | 100.0      | 1.44            | 39.2   | 34.9       | 111.7      | 0.25            | 37.0   | 27.8       | 90.1       | 0.00            |

**Figure S1. Thermal Difference and CD spectra and of SMG01-SMG04 sequences**

(a) Normalized TDS measured in 150 mM KCl, 20 mM phosphate buffer (pH 7.2), 2  $\mu$ M DNA. (b) CD spectra measured in 150 mM KCl, 20 mM phosphate buffer (pH 7.2), 10  $^{\circ}$ C, 2  $\mu$ M DNA. The arrows indicate those spectral features that have been related to the formation of an antiparallel G-quadruplex by SMG03 sequence.

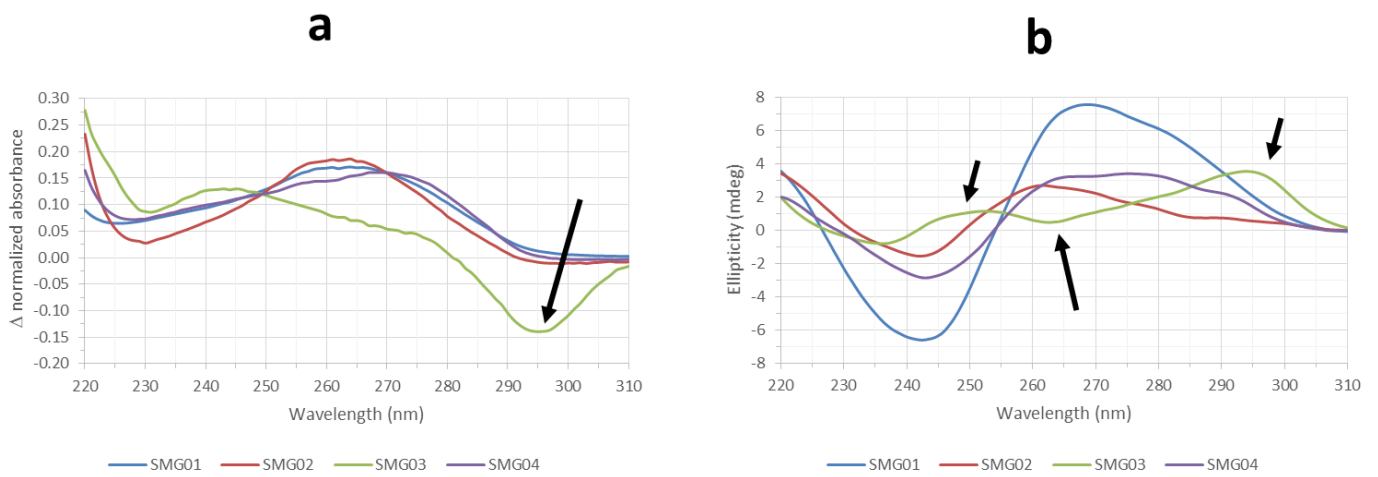

**Figure S2. Acid-base titration of SMG03**

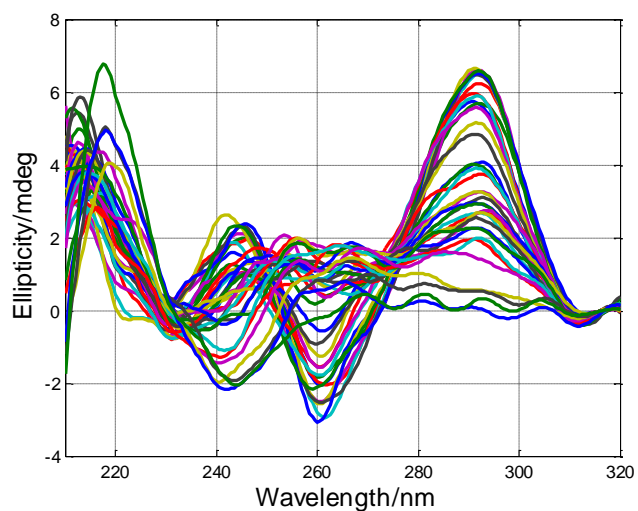

Complete set of 37 CD spectra  
measured from pH 2 to pH 12.  
Experimental conditions as detailed  
in Figure 2.

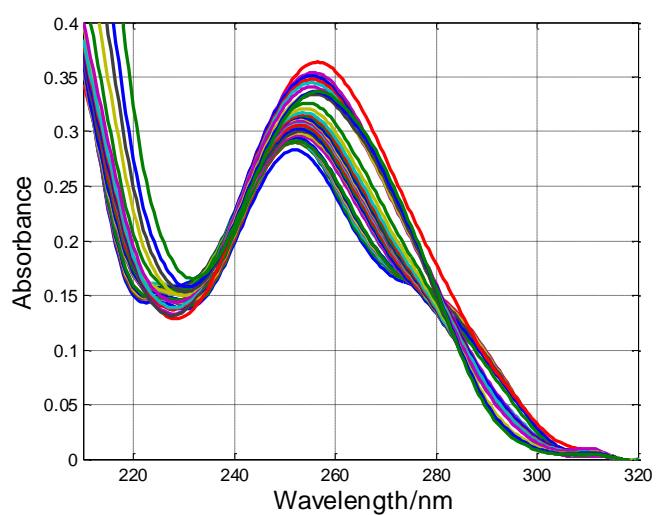

Complete set of 37 molecular  
absorption spectra.

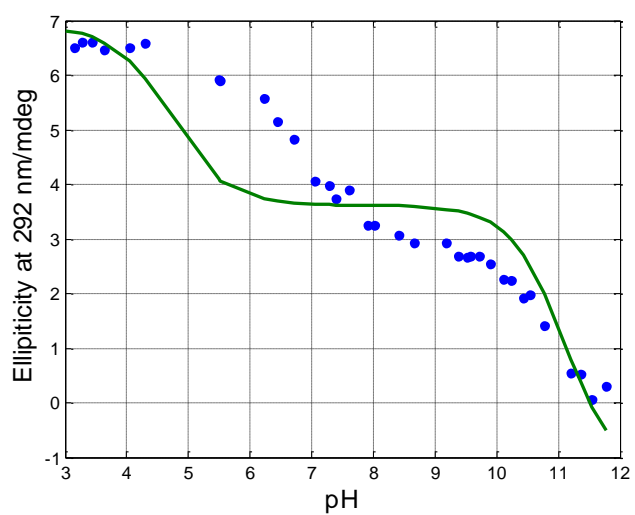

Experimental CD (blue symbols) and  
calculated with a proposed model of  
three acid-base components (green  
line) at 292 nm



**Figure S3. Acid-base titration of TBA**

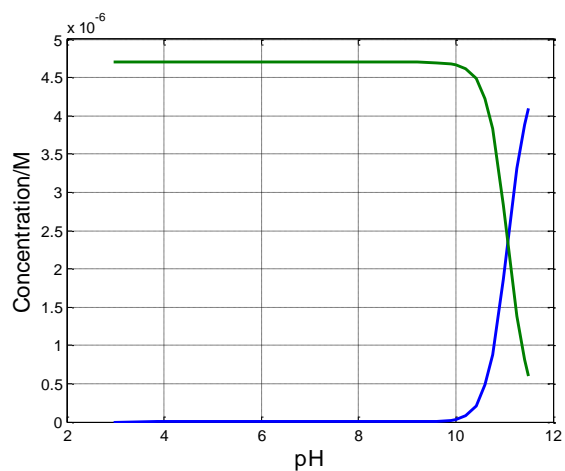

Calculated distribution diagram for the model including two acid-base components. Green: G-quadruplex showing all bases in neutral form. Blue: unfolded strand showing deprotonated guanine bases.

Experimental conditions were 150 mM KCl, 20 °C. DNA concentration was 2  $\mu$ M.

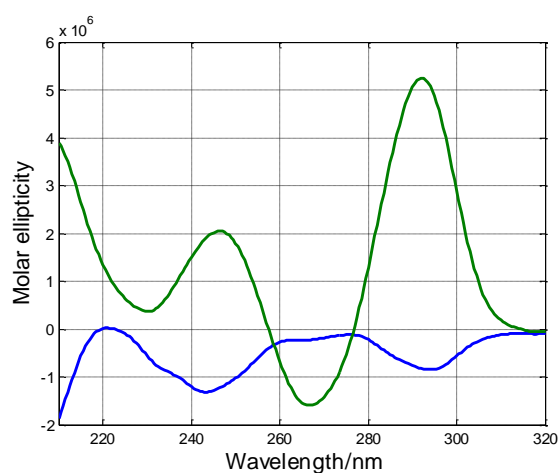

Calculated pure CD spectra for the two acid-base components. Green: TBA showing all bases in neutral form. Blue: unfolded strand showing deprotonated guanine bases.

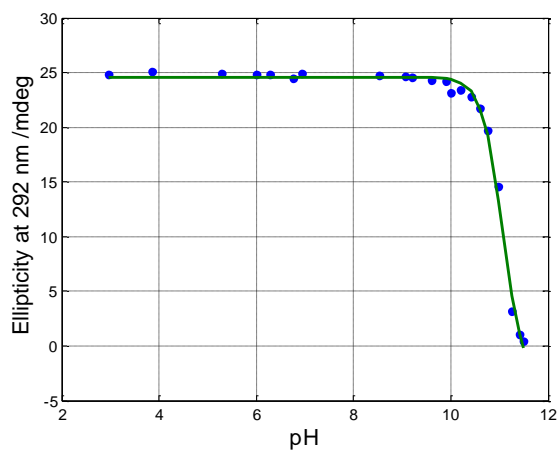

Experimental CD (blue symbols) and calculated with the proposed model of two species (green line) at 292 nm.

**Figure S4. Acid-base titration of SMG03T6**

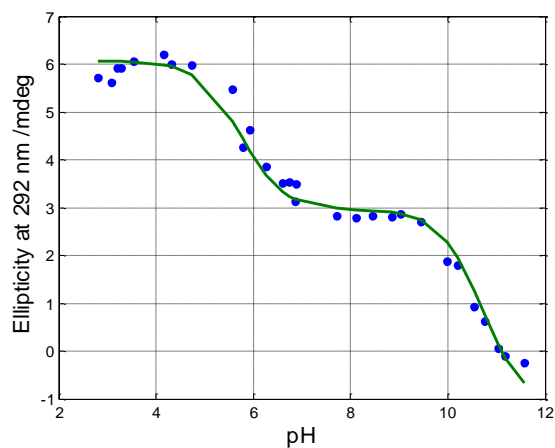

Experimental CD (blue symbols) and calculated with the proposed model of three species (green line) at 292 nm. Experimental conditions were 150 mM KCl, 20 °C. DNA concentration was 2  $\mu$ M.

**Figure S5. Acid-base titration of SMG03T11**

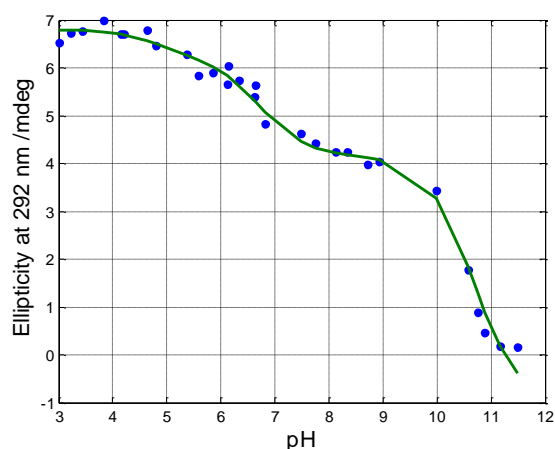

Experimental CD (blue symbols) and calculated with the proposed model of four species (green line) at 292 nm. Experimental conditions were 150 mM KCl, 20 °C. DNA concentration was 2  $\mu$ M.

**Figure S6. Acid-base titration of SMG03T16**

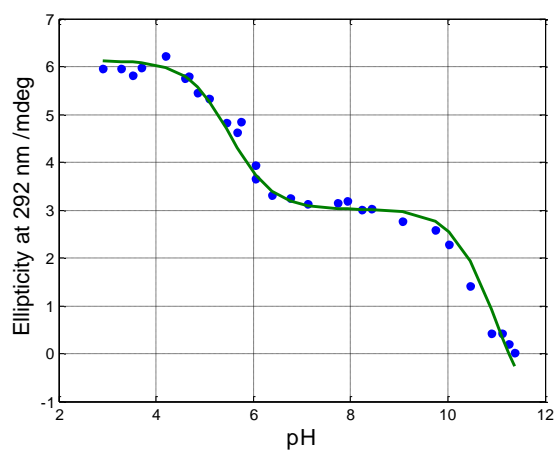

Experimental CD (blue symbols) and calculated with the proposed model of three species (green line) at 292 nm. Experimental conditions were 150 mM KCl, 20 °C. DNA concentration was 2  $\mu$ M.

**Figure S7. Heating/cooling traces of SMG03 at pH 5.0 and 6.0.**

Experiments carried out in 20 mM acetate or phosphate buffer, 150 mM KCl, 2  $\mu$ M DNA concentration. The figures present raw data without any baseline subtraction.

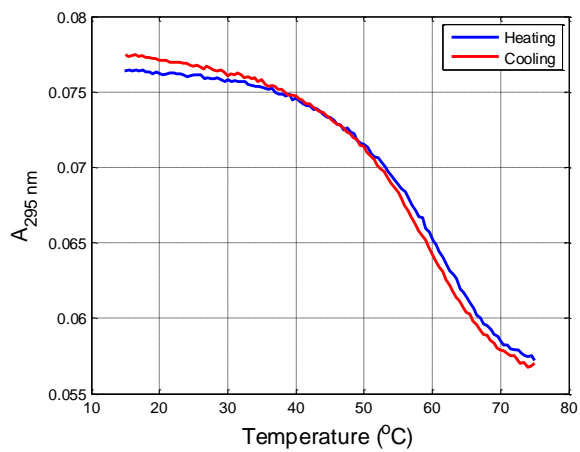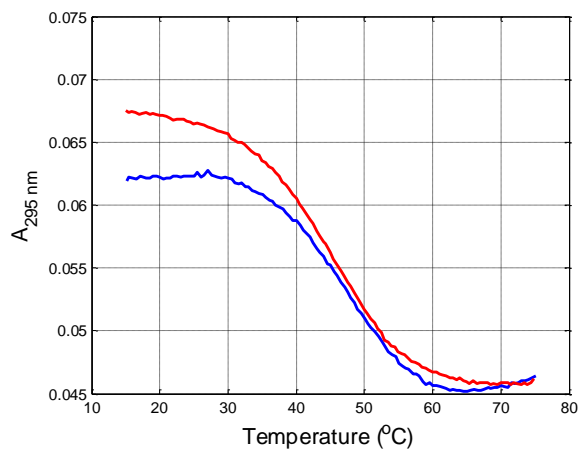

**Figure S8. CD and melting experiments of SMG03A7.**

CD spectra (left) and experimental and fitted melting curves using a two-state model. Experiments were carried out in 150 mM KCl, 20 mM phosphate or acetate buffer.

SMG03A7 a pH 7.4

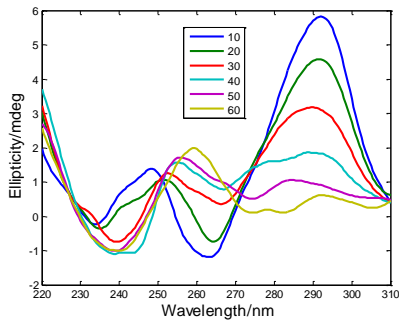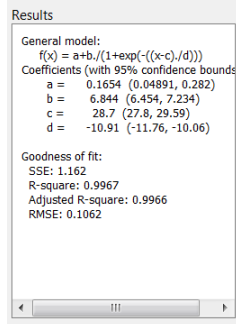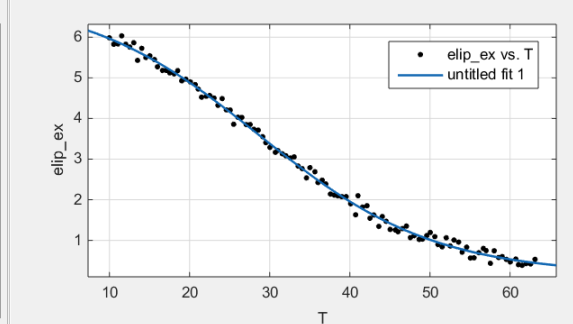

SMG03A7 a pH 4.9

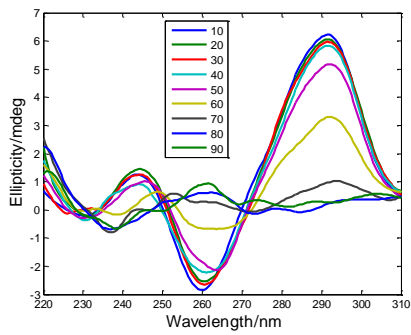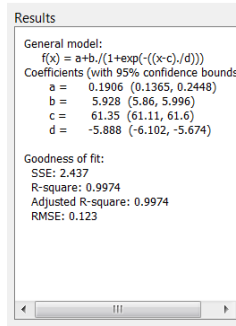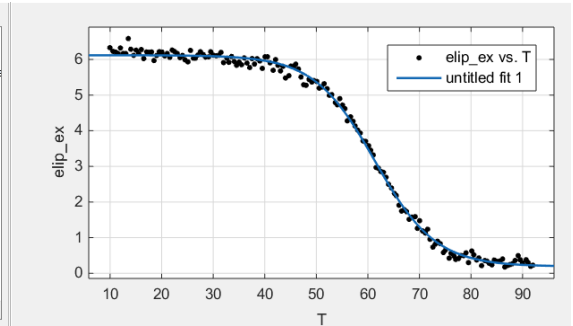

Figure S9. Size-Exclusion chromatography

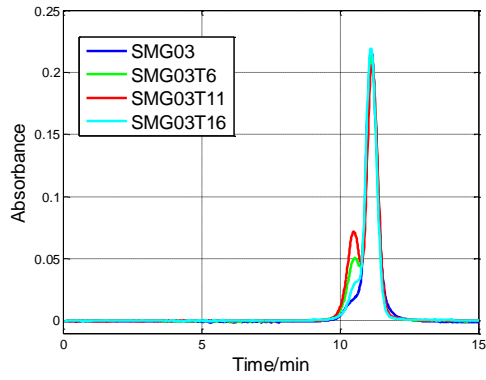

Raw chromatograms at 20 °C.

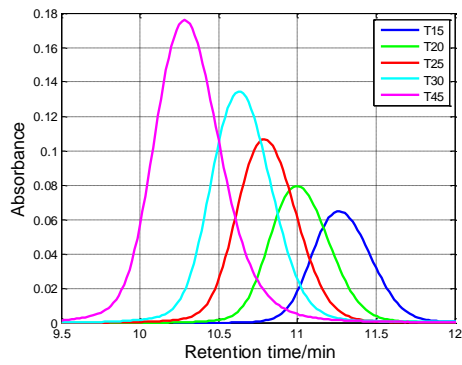

Chromatograms of Tx standards

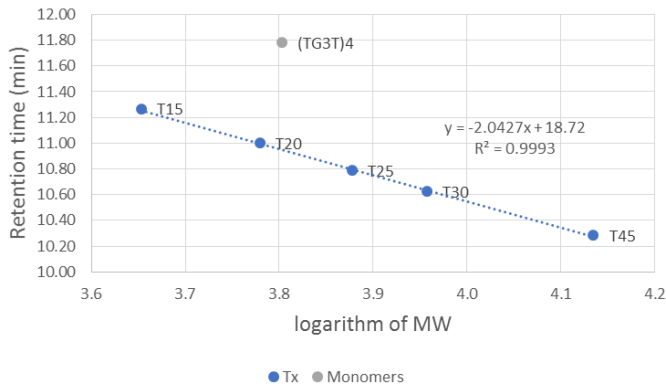

Calibration plot

Calculation of the retention time for unfolded SMG03 and mutants.

|          | MW     | log(MW) | tR exp. pH 7 | tR calc. | Variat. (%) | log(MW calc) | MW calc | ratio |
|----------|--------|---------|--------------|----------|-------------|--------------|---------|-------|
| SMG03    | 6619.3 | 3.82    | 10.50        | 10.92    | -3.80%      | 4.024        | 10570.3 | 1.60  |
|          | 6619.3 | 3.82    | 11.13        | 10.92    | 1.97%       | 3.716        | 5196.0  | 0.78  |
| SMG03T6  | 6634.4 | 3.82    | 10.50        | 10.91    | -3.79%      | 4.024        | 10570.3 | 1.59  |
|          | 6634.4 | 3.82    | 11.13        | 10.91    | 1.99%       | 3.716        | 5196.0  | 0.78  |
| SMG03T11 | 6634.4 | 3.82    | 10.49        | 10.91    | -3.88%      | 4.029        | 10690.1 | 1.61  |
|          | 6634.4 | 3.82    | 11.15        | 10.91    | 2.17%       | 3.706        | 5080.2  | 0.77  |
| SMG03T16 | 6634.4 | 3.82    | 10.53        | 10.91    | -3.51%      | 4.009        | 10218.8 | 1.54  |
|          | 6634.4 | 3.82    | 11.10        | 10.91    | 1.71%       | 3.730        | 5374.7  | 0.81  |

**Figure S10. Imino proton region of  $^1\text{H}$  NMR spectra at pH 9.0.**

(a) SMG03, (b) SMG03T11 and (c) SMG03T6 at 25°C, 20 mM phosphate buffer and 150 mM KCl, 0.15 mM DNA concentration.

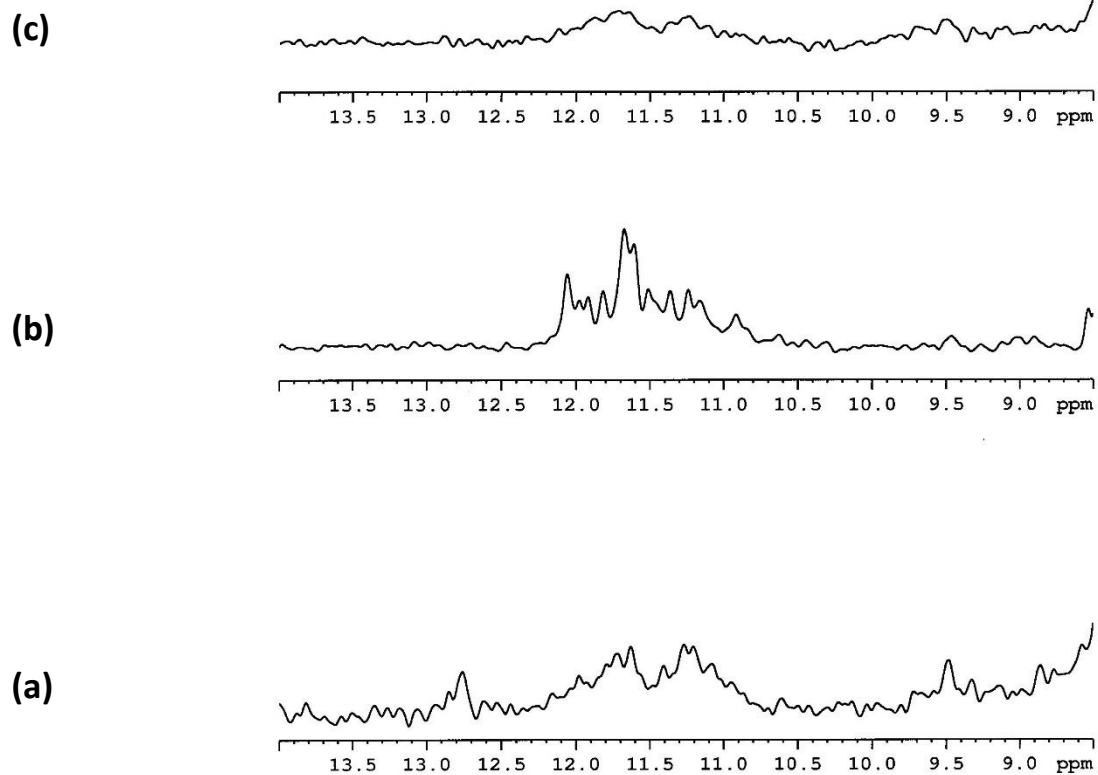

**Figure S11. Imino proton region of  $^1\text{H}$  NMR spectra of SMG03 at different temperatures.**

(a) 25°C, (b) 10°C and (c) 5°C, 20 mM phosphate buffer and 150 mM KCl, pH 6.0, 0.15 mM DNA concentration.

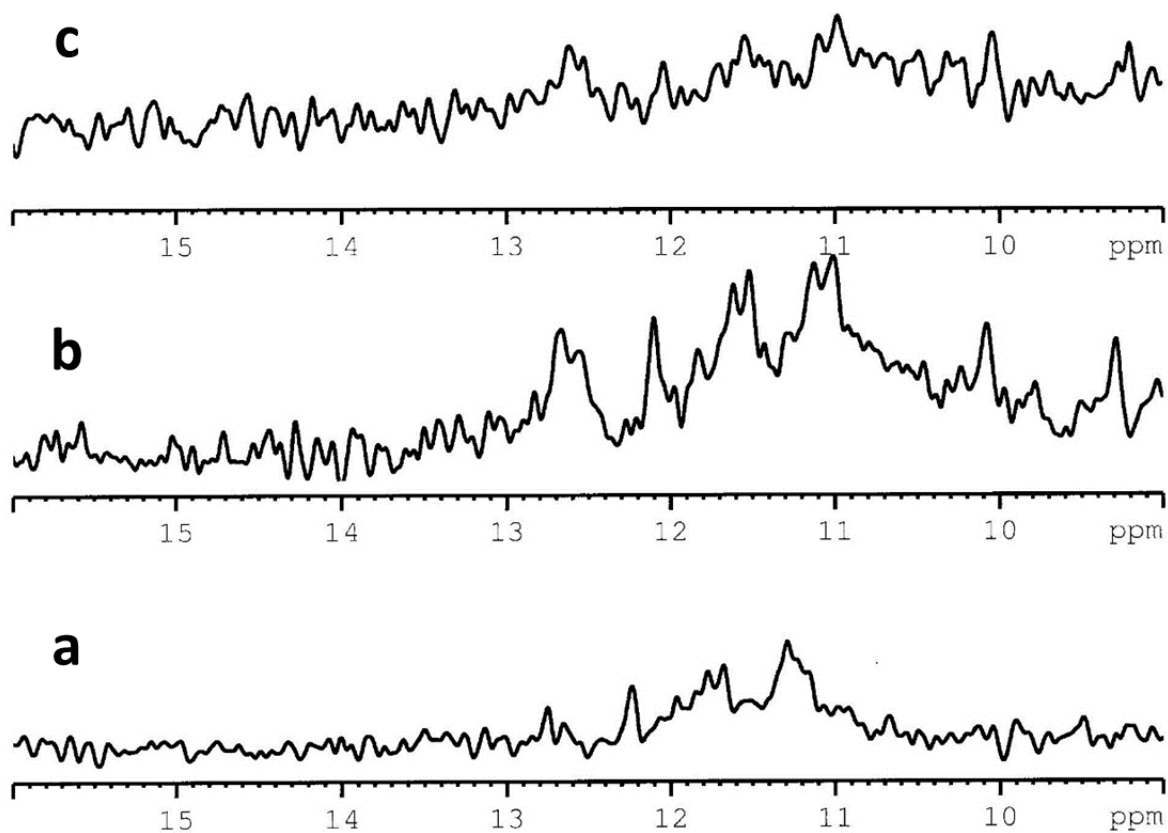

Figure S12. Augmented bilinear model for a row-wise augmented matrix of the same by CD and molecular spectroscopy.

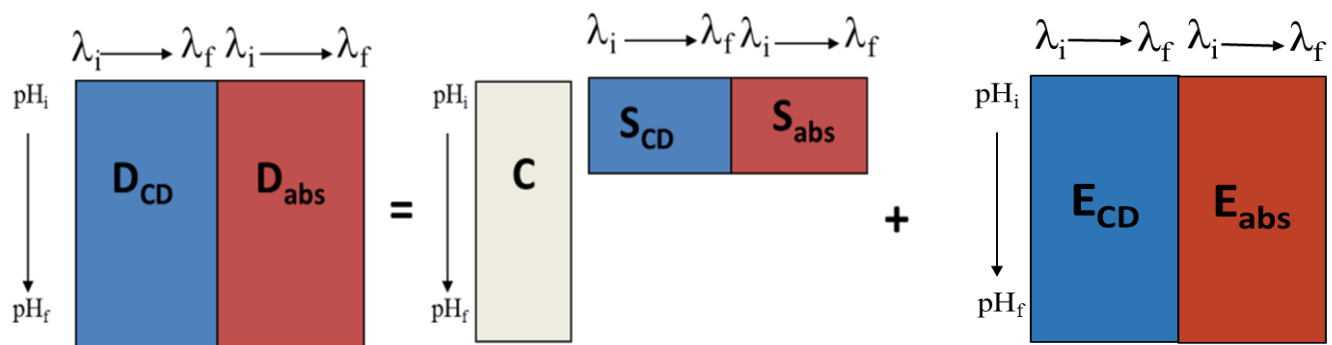



**Figure S13. Multivariate analysis of acid-base titrations of SMG01, SMG01T6 and SMG01T16.**

Calculated distribution diagrams (a, c, and e) and CD spectra (b, d, and f) for each one of the acid-base components considered in the multivariate analysis of spectra measured along the titrations of SMG01 (a, b), SMG01T6 (c, d) and SMG01T16 (e, f).

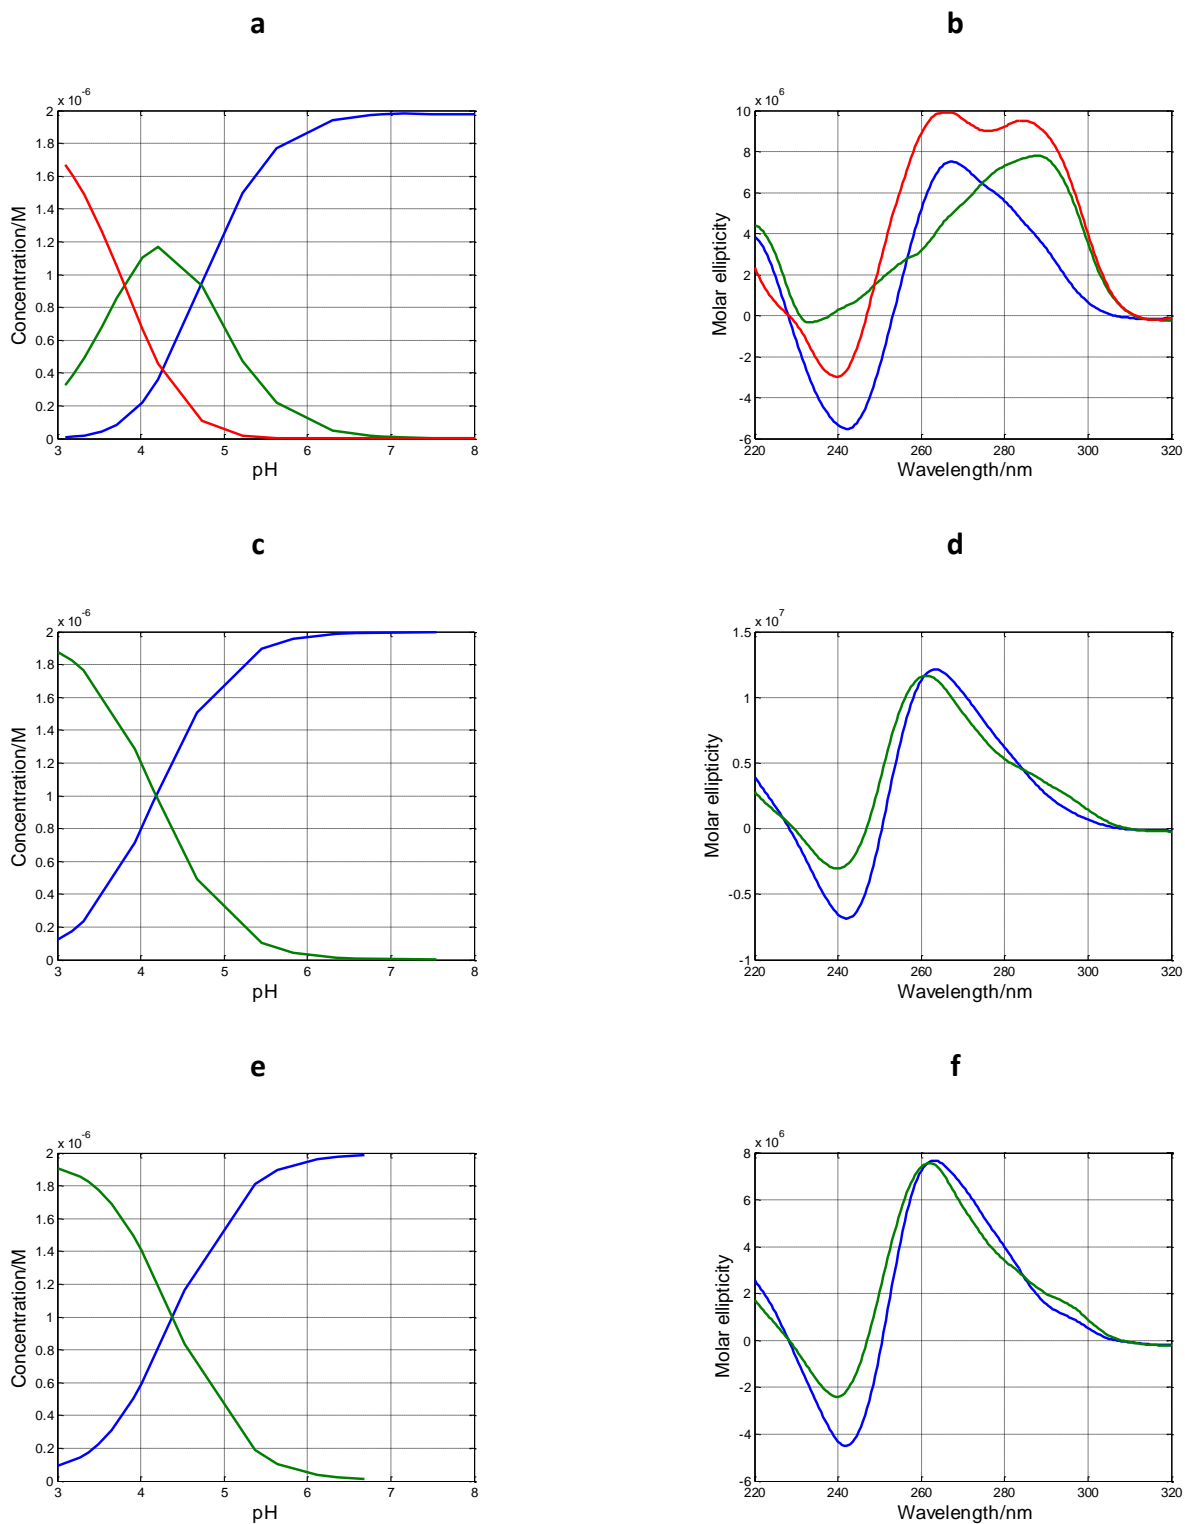

**Figure S14. MALDI-TOF MS spectra of oligonucleotides.**

To analyse Oligonucleotides mass spectra were recorded on a Matrix-assisted laser desorption ionization (MALDI) Voyager DETM RP time of-flight (TOF) spectrometer (Applied Biosystems, USA).

| Sequence | MW <sub>calculated</sub> | MW <sub>determined</sub> |
|----------|--------------------------|--------------------------|
| SMG01    | 13835.0                  | 13836.3                  |
| SMG02    | 7750.0                   | 7756.1                   |
| SMG03    | 6619.3                   | 6626.0                   |
| SMG04    | 8768.7                   | 8774.5                   |
| SMG03T6  | 6634.4                   | 6634.9                   |
| SMG03T11 | 6634.4                   | 6634.0                   |
| SMG03T16 | 6634.4                   | 6636.0                   |
| SMG03A7  | 6603.3                   | 6600.3                   |

**SMG01**

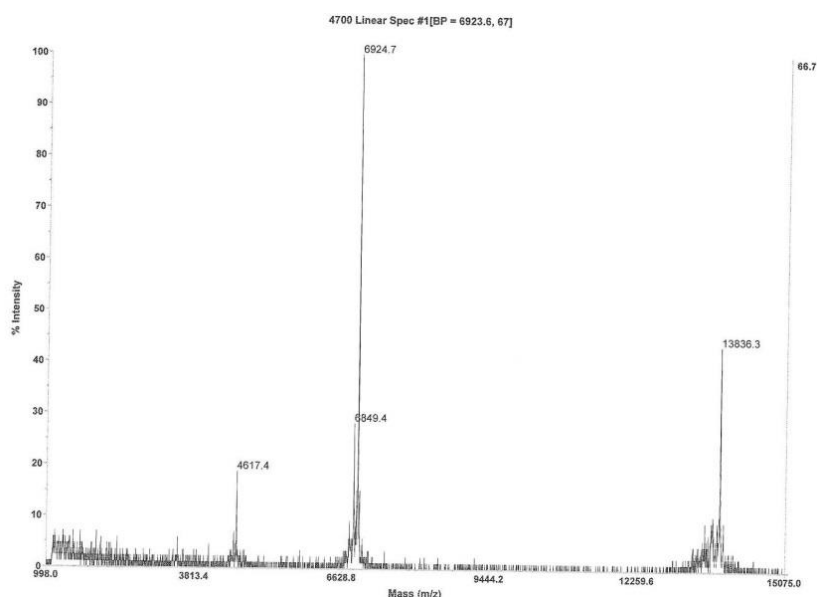

SMG02

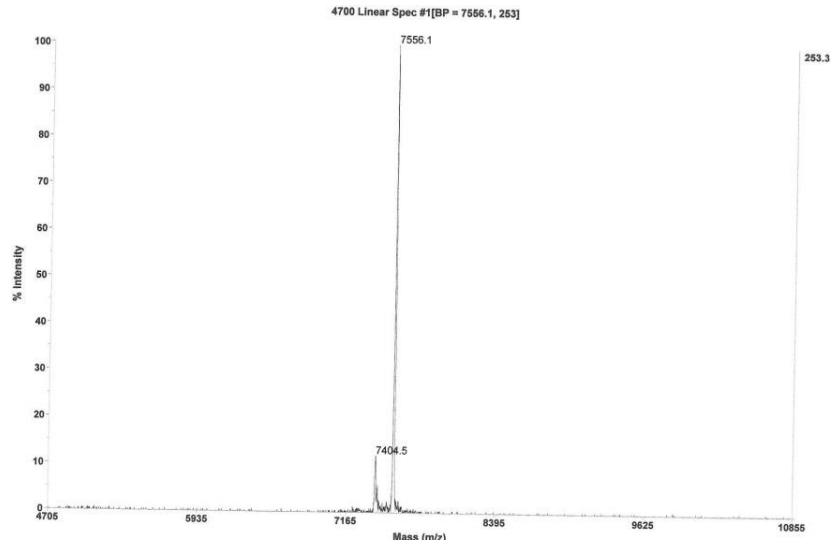

SMG03

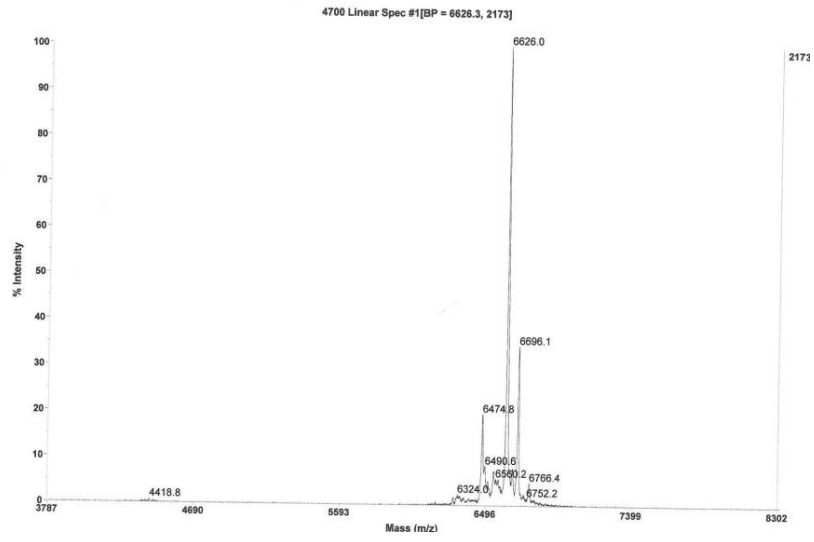

SMG04

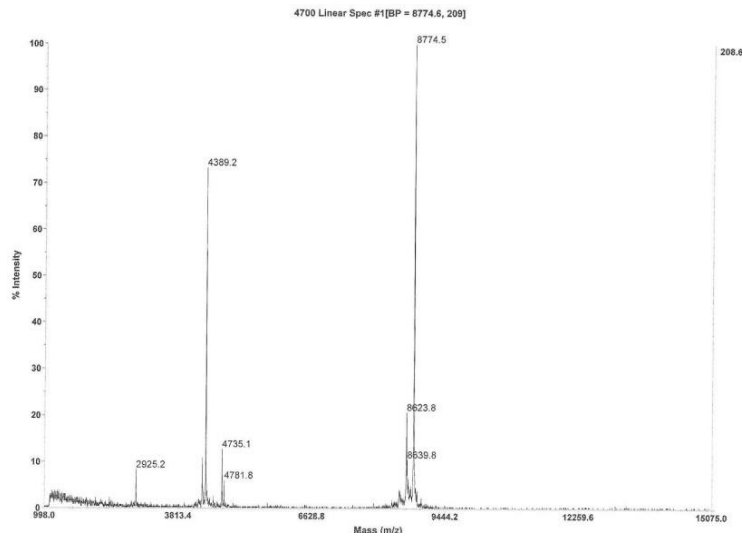

SMG03T6

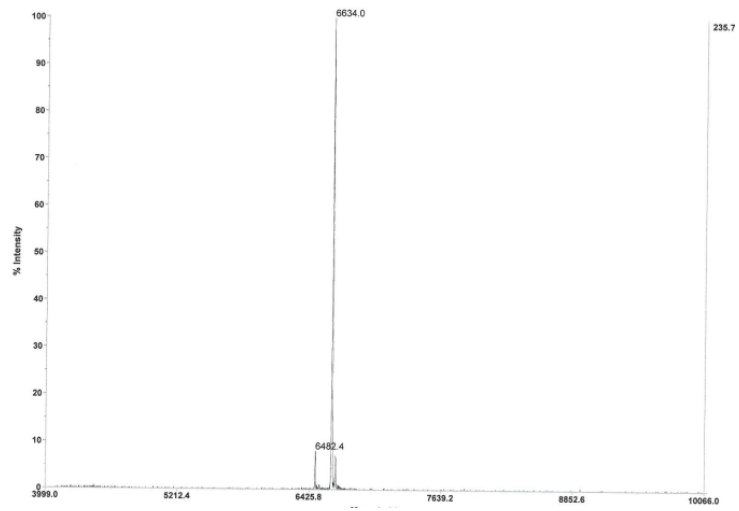

SMG03T11

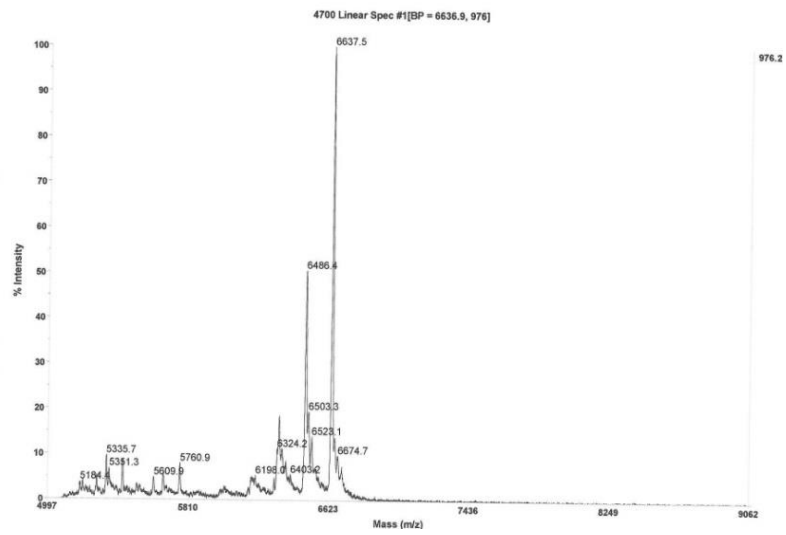

SMG03T16

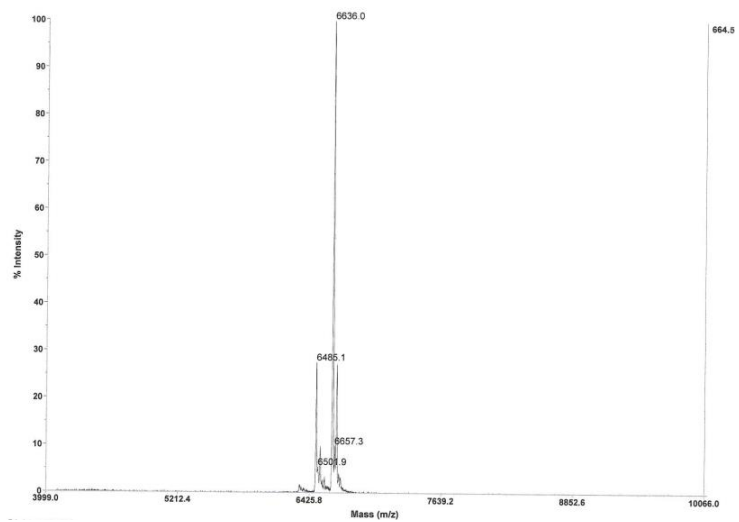

SMG03A7

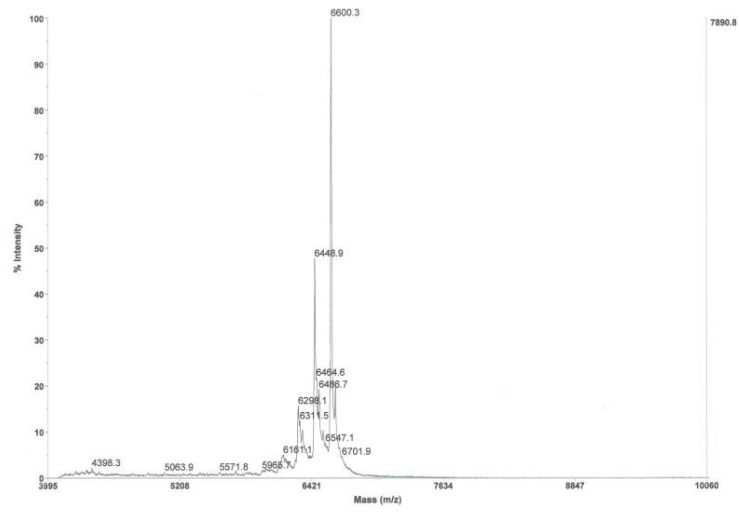

Supplement: 41598_2019_52311_MOESM1_ESM.pdf [file 41598_2019_52311_MOESM1_ESM.pdf]
